# Supplementary material
Source: publisher figshare collection journal article supplement (https://acs.figshare.com/ndownloader/files/20182535)
Supplement: Supplementary file 1 [file 20182535]

Compound	SMILES	pKi_CCR2	pIC50_CCR5	%Inhibition_CCR5
6	O=C1C(CC2=CC=CC(Cl)=C2)=C(C3CC3)NC4=NC=NN41	8.76 ± 0.01	-	60%
7	O=C1C(CC2=CC=CC(Cl)=C2)=C(C3CC3)NC4=NC(C)=NN41	8.46 ± 0.05	-	35%
8	O=C1C(CC2=CC=CC(Cl)=C2)=C(C3CC3)NC4=NC(N)=NN41	8.90 ± 0.04	6.24 ± 0.004	76%
9	O=C1C(CC2=CC=CC=C2)=C(C3CC3)NC4=NC(N)=NN41	8.27 ± 0.10	-	35%
10	O=C1C(CC2=CC=CC=C2C)=C(C3CC3)NC4=NC(N)=NN41	7.81 ± 0.05	-	28%
11	O=C1C(CC2=CC=CC=C2Cl)=C(C3CC3)NC4=NC(N)=NN41	7.84 ± 0.03	-	27%
12	O=C1C(CC2=CC=CC=C2OC)=C(C3CC3)NC4=NC(N)=NN41	6.98 ± 0.04	-	-20%
13	O=C1C(CC2=CC=CC(C)=C2)=C(C3CC3)NC4=NC(N)=NN41	8.61 ± 0.03	-	62%
14	O=C1C(CC2=CC=CC(F)=C2)=C(C3CC3)NC4=NC(N)=NN41	8.53 ± 0.18	-	43%
15	O=C1C(CC2=CC=CC(Br)=C2)=C(C3CC3)NC4=NC(N)=NN41	9.08 ± 0.06	-	60%
16	O=C1C(CC2=CC=CC(I)=C2)=C(C3CC3)NC4=NC(N)=NN41	9.06 ± 0.02	-	66%
17	O=C1C(CC2=CC=CC(OC)=C2)=C(C3CC3)NC4=NC(N)=NN41	7.89 ± 0.07	-	-27%
18	O=C1C(CC2=CC=CC(C(F)(F)F)=C2)=C(C3CC3)NC4=NC(N)=NN41	8.26 ± 0.09	-	36%
19	O=C1C(CC2=CC=C(C)C=C2)=C(C3CC3)NC4=NC(N)=NN41	8.46 ± 0.03	-	-57%
20	O=C1C(CC2=CC=C(F)C=C2)=C(C3CC3)NC4=NC(N)=NN41	8.39 ± 0.03	-	31%
21	O=C1C(CC2=CC=C(Cl)C=C2)=C(C3CC3)NC4=NC(N)=NN41	8.74 ± 0.05	-	31%
22	O=C1C(CC2=CC=C(Br)C=C2)=C(C3CC3)NC4=NC(N)=NN41	8.84 ± 0.02	-	14%
23	O=C1C(CC2=CC=C(OC)C=C2)=C(C3CC3)NC4=NC(N)=NN41	7.68 ± 0.05	-	-28%
24	O=C1C(CC2=CC=CC(Cl)=C2)=C(C)NC3=NC(N)=NN31	7.78 ± 0.07	-	-35%
25	O=C1C(CC2=CC=CC(Cl)=C2)=C(CC)NC3=NC(N)=NN31	8.40 ± 0.07	-	29%
26	O=C1C(CC2=CC=CC(Cl)=C2)=C(CCC)NC3=NC(N)=NN31	8.46 ± 0.07	-	64%
27	O=C1C(CC2=CC=CC(Cl)=C2)=C(C(C)C)NC3=NC(N)=NN31	8.72 ± 0.05	6.56 ± 0.05	83%
28	O=C1C(CC2=CC=CC(Cl)=C2)=C(CCCC)NC3=NC(N)=NN31	8.64 ± 0.03	6.29 ± 0.05	73%
29	O=C1C(CC2=CC=CC(Cl)=C2)=C(CC(CC)CC)NC3=NC(N)=NN31	8.20 ± 0.04	-	29%
30	O=C1C(CC2=CC=CC(Cl)=C2)=C(CCCCC)NC3=NC(N)=NN31	8.14 ± 0.03	-	38%
31	O=C1C(CC2=CC=CC(Cl)=C2)=C(C3CCCC3)NC4=NC(N)=NN41	8.81 ± 0.04	6.43 ± 0.08	81%
32	O=C1C(CC2=CC=CC(Cl)=C2)=C(CCCCCC)NC3=NC(N)=NN31	7.66 ± 0.02	-	-63%
33	O=C1C(CC2=CC=CC(Cl)=C2)=C(CCCCCCC)NC3=NC(N)=NN31	6.76 ± 0.05	-	-265%
34	O=C1C(CC2=CC=CC(Cl)=C2)=C(C3=CC=CC=C3)NC4=NC(N)=NN41	7.64 ± 0.17	-	-41%
35	O=C1C(CC2=CC=CC(Cl)=C2)=C(C3=CC=C(C)C=C3)NC4=NC(N)=NN41	6.81 ± 0.07	-	-13%
36	O=C1C(CC2=CC=CC(Cl)=C2)=C(CCC3=CC=CC=C3)NC4=NC(N)=NN41	7.29 ± 0.05	-	-42%
37	O=C1C(CC2=CC=C(Cl)C(Cl)=C2)=C(C3CC3)NC4=NC(N)=NN41	9.35 ± 0.05	6.67 ± 0.03	93%
38	O=C1C(CC2=CC=C(Cl)C(Cl)=C2)=C(C(C)C)NC3=NC(N)=NN31	9.22 ± 0.05	6.91 ± 0.09	80%
39	O=C1C(CC2=CC=CC(Cl)=C2Cl)=C(C(C)C)NC3=NC(N)=NN31	8.81 ± 0.07	7.09 ± 0.07	85%
40	O=C1C(CC2=CC(Cl)=CC=C2Cl)=C(C(C)C)NC3=NC(N)=NN31	7.65 ± 0.03	-	20%
41	O=C1C(CC2=CC(Cl)=CC(Cl)=C2)=C(C(C)C)NC3=NC(N)=NN31	8.66 ± 0.05	6.49 ± 0.06	89%
42	O=C1C(CC2=CC(Br)=CC(Br)=C2)=C(C(C)C)NC3=NC(N)=NN31	8.68 ± 0.01	-	64%
43	O=C1C(CC2=CC=C(Cl)C(Br)=C2)=C(C(C)C)NC3=NC(N)=NN31	9.42 ± 0.02	6.95 ± 0.04	84%
